# Supplementary figures and images for: Lipid Profile Rather Than the LCAT Mutation Explains Renal Disease in Familial LCAT Deficiency
Source: MDPI journal article supplement (doi:10.3390/jcm8111860), 2019-11-03

# Lipids

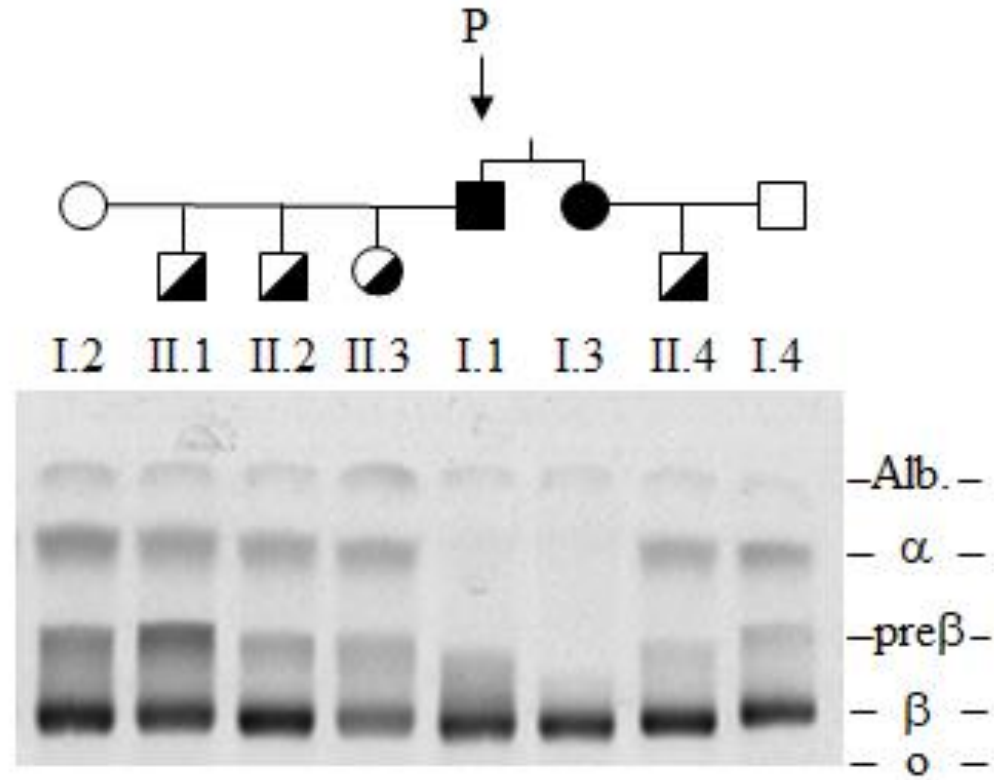

Supplement: s1 [file s1]

Control 1  CTR  
Control 2  CTR  
Control 3  CTR  
Second case  LCAT  
Third case  LCAT

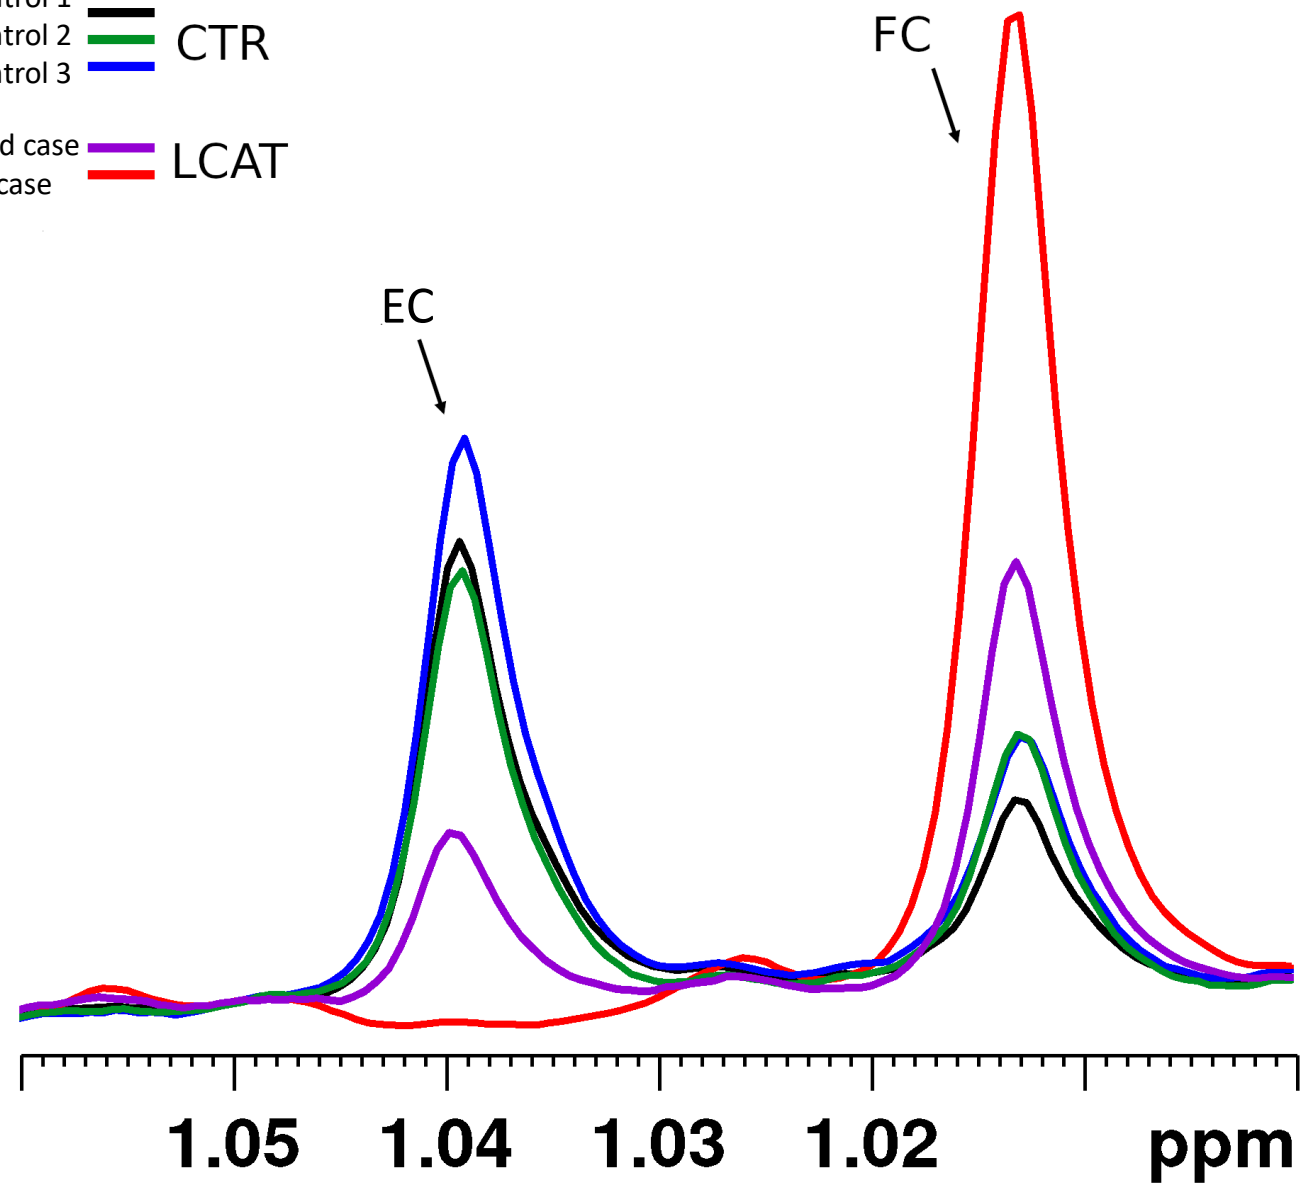

Supplement: s1 [file s1]
